# Supplementary material
Source: PubMed Central journal article supplement (PMC2442466)
Supplement: NIHMS46257-supplement-01.pdf [file NIHMS46257-supplement-01.pdf]

## **Cell, Volume 133**

### **Supplemental Data**

#### **Rapid Synthesis of Auxin**

#### **via a New Tryptophan-Dependent Pathway**

#### **Is Required for Shade Avoidance in Plants**

Yi Tao, Jean-Luc Ferrer, Karin Ljung, Florence Pojer, Fangxin Hong, Jeff A. Long, Lin Li, Javier E.

Moreno, Marianne E. Bowman, Lauren J. Ivans, Youfa Cheng, Jason Lim, Yunde Zhao, Carlos L.

Ballaré, Göran Sandberg, Joseph P. Noel, and Joanne Chory

#### **Supplemental Experimental Procedures**

##### **Detailed Growth Conditions**

For the greenhouse experiment described in Figure 1, seedlings were grown for 4 weeks on a greenhouse bench without supplemental lighting (peak photosynthetically active radiation at midday was  $1200 \mu\text{mol m}^{-2} \text{s}^{-1}$ ). Seedlings were then aligned in front of banks of incandescent lamps covered with either opaque screens (-FR treatment) or FR filters (+FR treatment). Plants were irradiated with FR from 10:00 to 19:00 every day. The R:FR ratios, measured with a Skye SKR 100/SKR 110 radiometer pointed to the light sources (Skye Instruments), were 0.24 and 0.68 for +FR and -FR treatments, respectively (Izaguirre et al., 2006). The drop in R:FR caused by FR supplementation was equivalent to the effect of neighbor proximity in a canopy of leaf-area index = 0.5. For responses to picloram (Sigma), seedlings were grown on  $\frac{1}{2}$  MS supplemented with varying amounts of picloram for 3 days under Wc. The plates were then either left in Wc or transferred to simulated shade for 3 days before hypocotyl measurements were made. For microarray experiments, seedlings were grown under simulated white light condition (R:  $13 \mu\text{E}\cdot\text{m}^{-2}\cdot\text{s}^{-1}$ ; B:  $1.23 \mu\text{E}\cdot\text{m}^{-2}\cdot\text{s}^{-1}$ ; (R:FR ratio of 1.1)) for 7 days and were then

treated with simulated white light or simulated shade for 1 hour. Whole seedlings were collected. For 5-MT sensitivity tests, seedlings were grown for 9 days on ½ MS supplemented with 20 µM of 5-MT (Sigma) in Wc.

### **Protein Sequence Alignment**

Protein sequence alignment was carried out using clustalW program (<http://www.ebi.ac.uk/Tools/clustalw2/index.html>) and visualized as box shade alignment ([http://www.ch.embnet.org/software/BOX\\_form.html](http://www.ch.embnet.org/software/BOX_form.html)).

### **Constructs**

For complementation experiments, genomic *TAA1* DNA, including 2 Kb of upstream sequence and 800 bp of downstream sequence, was PCR-amplified from Col-0 genomic DNA and cloned into the pJHA212K vector using EcoRI and PstI sites (Yoo et al., 2005). For expression pattern analysis of *TAA1*, the *uidA* gene was first cloned into pJHA212K using Sall/BamHI; the 2 Kb promoter of *TAA1* was PCR-amplified and cloned in pJHA212K-GUS using KpnI/SacI; finally the genomic DNA of *TAA1* and the 800bp DNA downstream region of *TAA1* was PCR-amplified and inserted using the Sall site. For *TAA1* localization test, *TAA1* cDNA was first amplified from a cDNA library from Col-0 and was then cloned into a modified pPZP212 vector with YFP (Chen et al., 2005). For complementation tests with the mutant form of *TAA1*, cDNA of *TAA1* was cloned into a modified pPZP212 vector with 3X Flag tag (Wang et al., 2005). This clone was then used as a template for DpnI-directed mutagenesis to generate the indicated mutation using QuikChange® Site-Directed Mutagenesis Kit from Stratagene.

### **Quantification of free IAA and IAA biosynthesis rate**

Col-0 and *sav3-2* seedlings were grown under Wc for 7 days after germination. They were then treated with or without simulated shade for one hour and the aerial parts of seedlings were pooled, weighed and frozen in liquid nitrogen for quantification of free IAA content. Four

replicates were analyzed for samples without shade treatment and three replicates were analyzed for samples with shade treatment. The frozen samples (15 mg of plant tissue (fresh weight)) was homogenized in 0.5 ml 50 mM Na-phosphate buffer pH 7.0 containing 0.02% diethyldithiocarbamic acid (antioxidant) and 500 pg  $^{13}\text{C}_6$ -IAA internal standard, using the Retsch vibration mill (Retsch GmbH & Co. KG) and a 3 mm tungsten carbide bead at a frequency of 30 Hz for 2 min. The pH was adjusted to 2.7 and the sample was then purified by solid phase extraction on a 500 mg Isolute C<sub>8</sub>-EC column (International Sorbent Technology) conditioned with 2 ml methanol and 2 ml 1% acetic acid. The column was washed with 2 ml 10% methanol in 1% acetic acid, eluted with 2 ml 70% methanol in 1% acetic acid and the sample was evaporated to dryness. The sample was dissolved in 0.2 ml 2-propanol and 1 ml dichloromethane, and IAA was methylated by adding 5  $\mu\text{l}$  2 M trimethylsilyl-diazomethane in hexane (Aldrich). The sample was then left at room temperature for 30 min. 5  $\mu\text{l}$  of 2 M acetic acid in hexane was added to destroy excess diazomethane and the sample was evaporated to dryness. The sample was then trimethyl-silylated and analyzed by gas chromatography-selected reaction monitoring–mass spectrometry as described (Edlund et al., 1995).

For IAA biosynthesis measurements, Col-0 and *sav3-2* seedlings were grown under Wc for 7 days after germination. Seedlings were pretreated with  $\frac{1}{2}$  MS containing 30%  $^2\text{H}_2\text{O}$  for 0.5 hours. They were then treated with Wc or shade for 2 hours and the aerial parts of 10 seedlings were collected and frozen in liquid nitrogen for each sample. Each treatment contains four replicates. Samples were homogenized, extracted and purified as described above. IAA synthesis rates were measured by GC-SRM-MS as described in Ljung et al. 2005 (Ljung et al., 2005). For calculation of the relative synthesis rate of IAA, enrichment is expressed as the ratio of deuterium-labeled IAA ( $m/z$  203+204+205) to unlabelled IAA ( $m/z$  202), after correction for natural isotope distribution to  $m/z$  203, 204 and 205. Four replicates were analyzed for all samples.

## Supplemental Figure Legends

### Figure S1. Description of the Mutant Screen and Molecular Characterization of the *sav3* Alleles

(A) Schematic diagram of the mutant screen.

(B) Hypocotyl length distribution of wild-type seedlings grown under Wc or simulated shade.

Pictures of representative seedlings are also shown.

(C) DNA agarose gel picture of RT-PCR products of *TAA1* (nucleotides 501 -1145 of the coding region, *TAA1-C*), full-length *TAA1* (*TAA1-F*) and ubiquitin control (*UBQ*) (left panel). In the right panel, relative expression levels of *TAA1* transcript were shown. Total RNAs were extracted from 5-day old seedlings grown under Wc. The expression levels of *TAA1* were measured using quantitative RT-PCR (qRT-PCR) in triplicates and were normalized against a reference gene (AT2G39960). Error bars represent standard error of means (SEM).

### Figure S2. Phenotypes of *sav3* Mutants

(A) *sav3* partially suppresses the phenotype of *phyb9*, a null mutant of *phyB*. Hypocotyl elongation in response to shade was quantitatively measured.

(B) Canopy height of *sav3-1* grown in the greenhouse with or without supplementary FR light.

(C) Hypocotyl elongation in response to high temperature. Seedlings were grown under Wc at 22°C for 3 days. They were then left at 22°C or transferred to 29°C and allowed to grow for 4 more days.

Mean values of at least 12 seedlings are shown and error bars represent SEM.

### Figure S3. Expression Analysis of *TAA1*-dependent and Independent Early Response Genes

(A) Expression patterns of *TAA1*-independent early response genes. Expression values of *PAR1*, *ATHB2*, *HFR1* and several other *TAA1*-independent shade-induced genes were obtained from our microarray data. For each gene, median expression value was set to one.

(B) Expression levels of *TAA1*-dependent early response genes, *IAA19* and *IAA29*, under Wc or shade, treated with or without 1 $\mu$ M IAA. 5-day-old, Wc-grown seedlings were soaked in control (1/2 MS) or 1/2 MS plus 1 $\mu$ M IAA solution and were then treated with simulated Wc or shade for 1 hour. Expression levels were quantified using qRT-PCR in triplicates and normalized by the expression level of the reference gene. Error bars represent SEM.

**Figure S4.** Expression Analysis of *TAA1* and Rescue with *iaaM*

(A) Quantification of *TAA1* mRNA levels. 5-day old WT seedlings were treated with Wc or shade for 2 hours and relative expression levels of *TAA1* were measured using qRT-PCR and were normalized to the reference gene.

(B) Hypocotyl phenotypes of transgenic lines expressing the bacterial *iaaM* gene under the control of the *TAA1* promoter in *sav3-2* background. 5-day old T<sub>2</sub> seedlings were treated with Wc or shade for 4 days. Transgenic lines (*sav3-2*) containing *TAA1* cDNA driven by *TAA1* promoter and *iaaM* gene driven by the 35S promoter were included as controls. Mean values of at least 12 seedlings are shown.

Error bars represent SEM.

**Figure S5.** Biochemical Characterization of *TAA1*

(A) Optimal temperature and pH of *TAA1*. The borate buffer assay was employed to assay the production of IPA. 100  $\mu$ l of reaction buffer containing 0.5M borate buffer (pH8.5 or as indicated), 10  $\mu$ M of PLP, 1mM pyruvate and 1  $\mu$ g of *TAA1* was incubated at 55  $^{\circ}$ C or indicated temperature for 5 minutes. The production of IPA was monitored by absorption at 330nm.

(B) Aminotransferase activity of *TAA1* towards various L- amino acids. 100  $\mu$ l of reaction mixtures containing 50 mM K<sub>2</sub>HPO<sub>4</sub>/KH<sub>2</sub>PO<sub>4</sub> (pH 8.5), 10mM  $\alpha$ -ketoglutarate, various amino acids (5mM) and 3 $\mu$ g of *TAA1* were incubated at 37 $^{\circ}$ C for 20 min. The reaction was stopped by heat inactivation (95 $^{\circ}$ C for 5 min). Production of L-glutamate was measured using a kit from

Boehringer Mannheim/ R-Biophram, which is based on an L-glutamic acid colorimetric method. The amount of L-glutamate was expressed as absorption at 492nm. The line marks the production of L-glutamate by TAA1 using L-Trp as a substrate. Using this line as a cutoff, TAA1 can use at least 6 out of the 19 amino acids (Phe, Tyr, Trp, Leu, Ala and Met) (Glu is not assayed due to the limit of the assay). Mean values of 3 measurements are shown. Error bars represent SEM.

(C) Km and Vmax of TAA1 to L-Phe and L-Tyr. Initial velocities of TAA1 in buffers with various concentrations of Phe or Tyr (0.125-4 mM) were measured using the borate buffer assay as described above except that 20 mM sodium pyruvate was utilized. Production of  $\beta$ -phenylpyruvate or p-hydroxyphenylpyruvate was measured by absorption at 310 nm. Km and Vmax were determined as described in the Materials and Methods.

#### **Figure S6.** Analysis of *Yucca* Pathway

(A) A subset of *Yucca* genes are induced by shade. *Yucca* genes are the rate-limiting enzymes for the tryptamine pathway of IAA biosynthesis (Zhao et al., 2001). Relative expression levels of *Yucca* gene family members from the microarray experiment are shown.

(B) Hypocotyl phenotypes of *yucca* mutants in shade. 5-day old seedlings were treated with Wc or shade (R:FR = 0.7) for 4 days before measurement. Mean values of at least 12 seedlings are presented. Error bars represent SEM.

#### **Supplemental References**

Chen, M., Tao, Y., Lim, J., Shaw, A., and Chory, J. (2005). Regulation of phytochrome B nuclear localization through light-dependent unmasking of nuclear-localization signals. *Curr Biol* *15*, 637-642.

Edlund, A., Eklof, S., Sundberg, B., Moritz, T., and Sandberg, G. (1995). A Microscale Technique for Gas Chromatography-Mass Spectrometry Measurements of Picogram Amounts of Indole-3-Acetic Acid in Plant Tissues. *Plant Physiol* *108*, 1043-1047.

Ljung, K., Hull, A. K., Celenza, J., Yamada, M., Estelle, M., Normanly, J., and Sandberg, G. (2005). Sites and regulation of auxin biosynthesis in *Arabidopsis* roots. *Plant Cell* *17*, 1090-1104.

Wang, X., Li, X., Meisenhelder, J., Hunter, T., Yoshida, S., Asami, T., and Chory, J. (2005). Autoregulation and homodimerization are involved in the activation of the plant steroid receptor BRI1. *Dev Cell* *8*, 855-865.

Yoo, S. Y., Bomblies, K., Yoo, S. K., Yang, J. W., Choi, M. S., Lee, J. S., Weigel, D., and Ahn, J. H. (2005). The 35S promoter used in a selectable marker gene of a plant transformation vector affects the expression of the transgene. *Planta* 221, 523-530.

Zhao, Y., Christensen, S. K., Fankhauser, C., Cashman, J. R., Cohen, J. D., Weigel, D., and Chory, J. (2001). A role for flavin monooxygenase-like enzymes in auxin biosynthesis. *Science* 291, 306-309.

A

**Procedure of Mutant Screen**

Sterilize EMS mutagenized seeds in ethanol and plate seeds on 1/2 MS medium

↓  
Keep at 4 °C for 4 days

↓  
Grow seedlings under continuous white light (Wc) for 5 days

↓  
Move seedlings to simulated shade (Mixture of red, blue and far-red light) and grow for 4 days

↓  
Select seedlings with short hypocyls

B

Hypocotyl Length Distribution of Col-0 seedlings

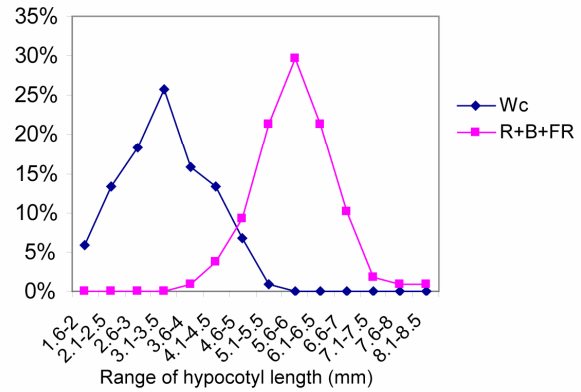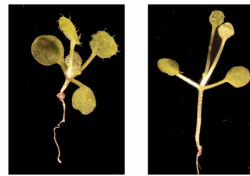

Wc Simulated Shade

C

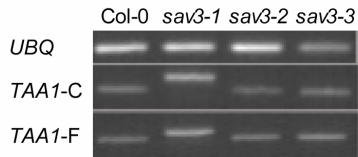

Relative Expression Level of TAA1

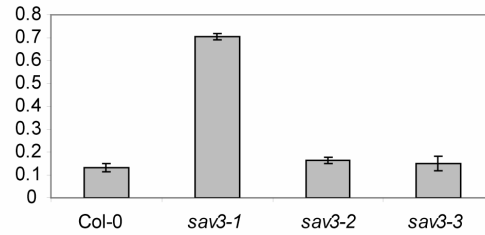

Figure S1



A

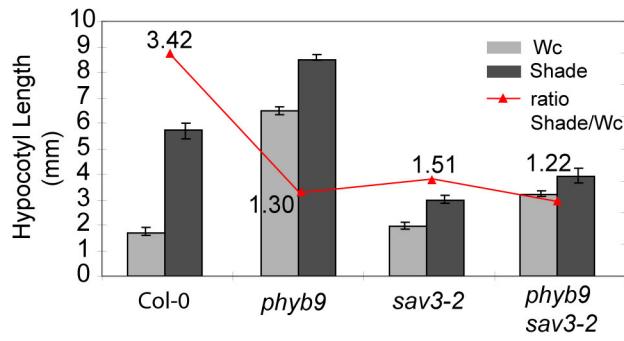

B

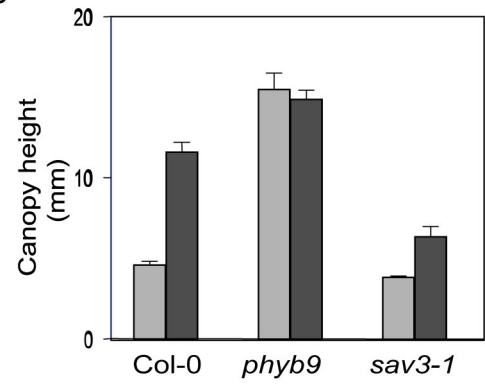

C

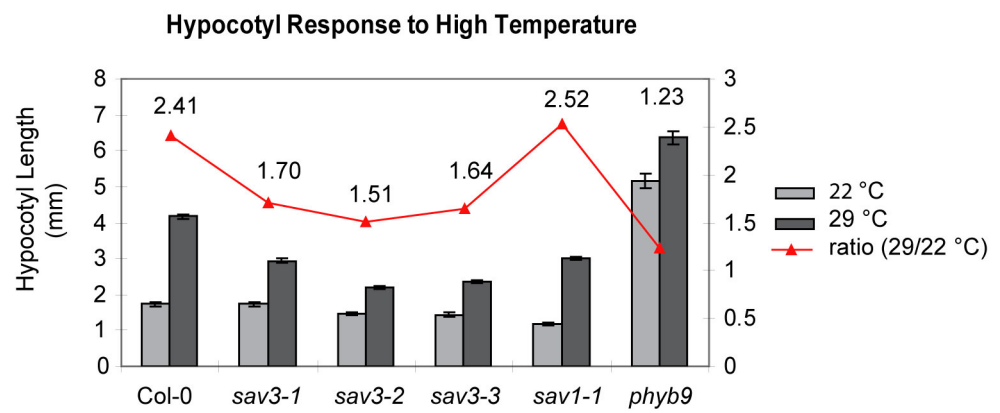

Figure S2

A

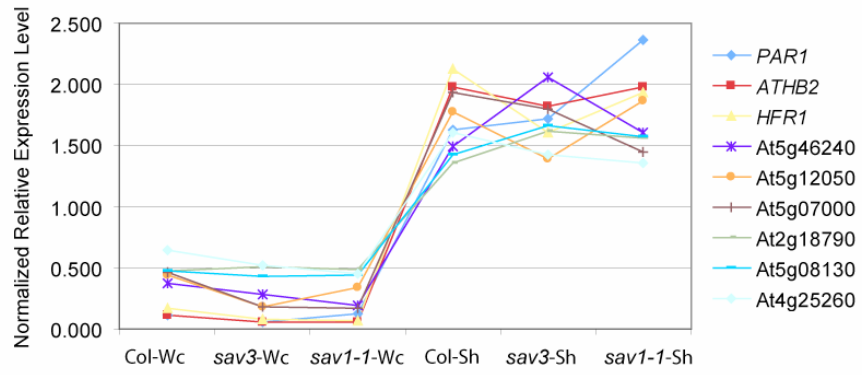

B

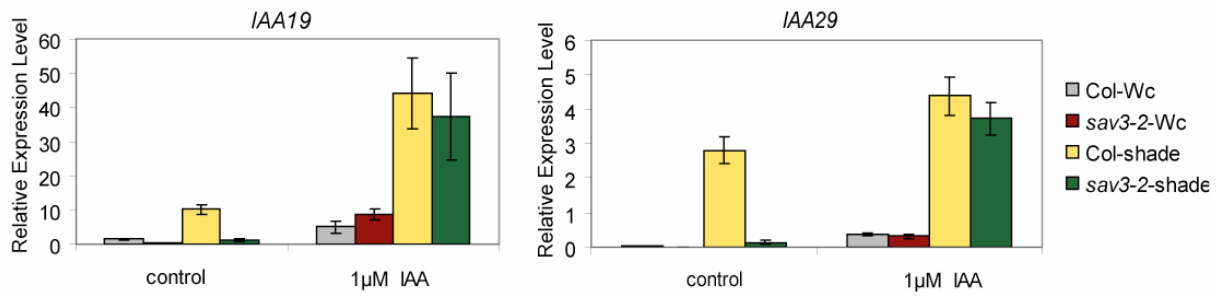

Figure S3

A

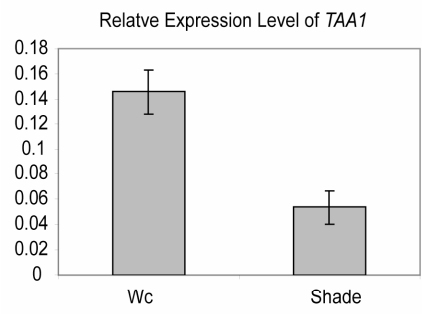

B

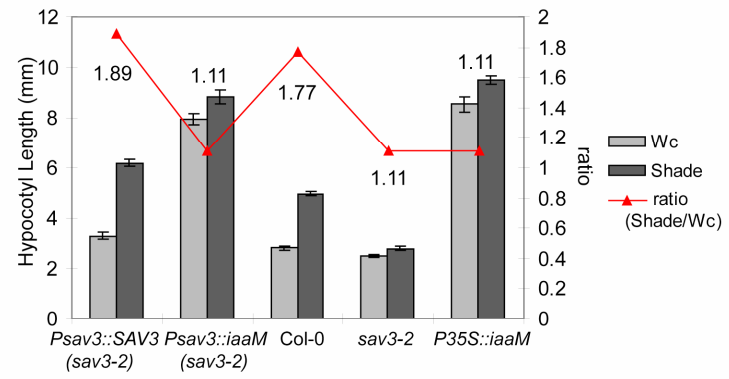

Figure S4

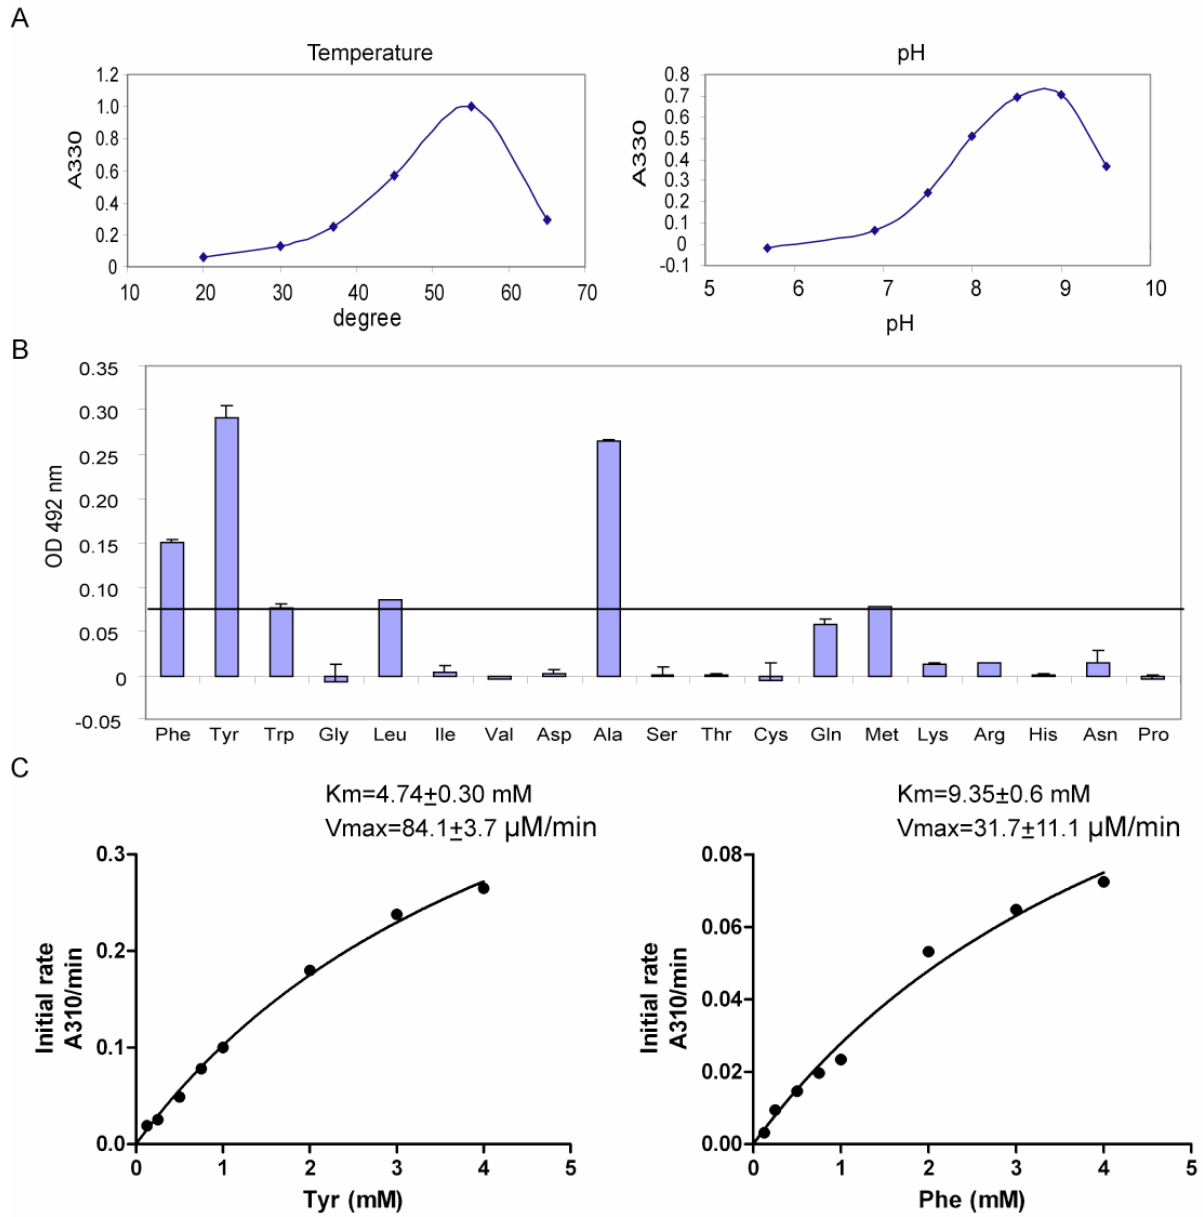

Figure S5

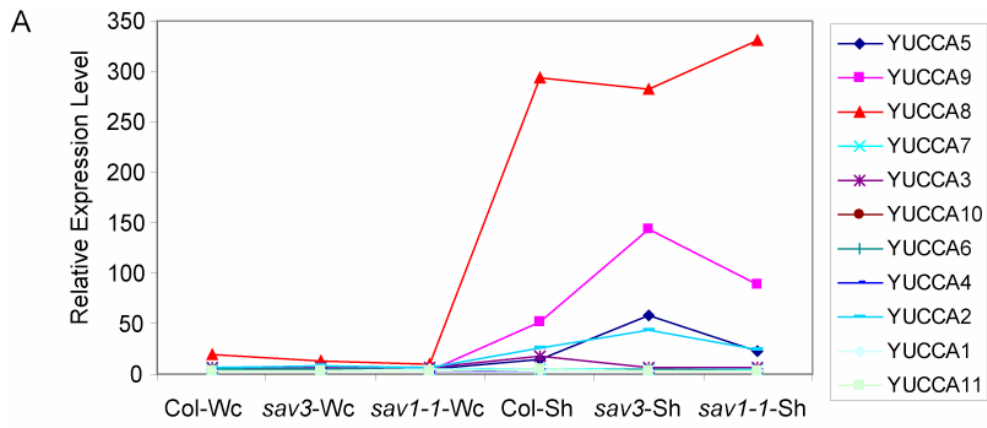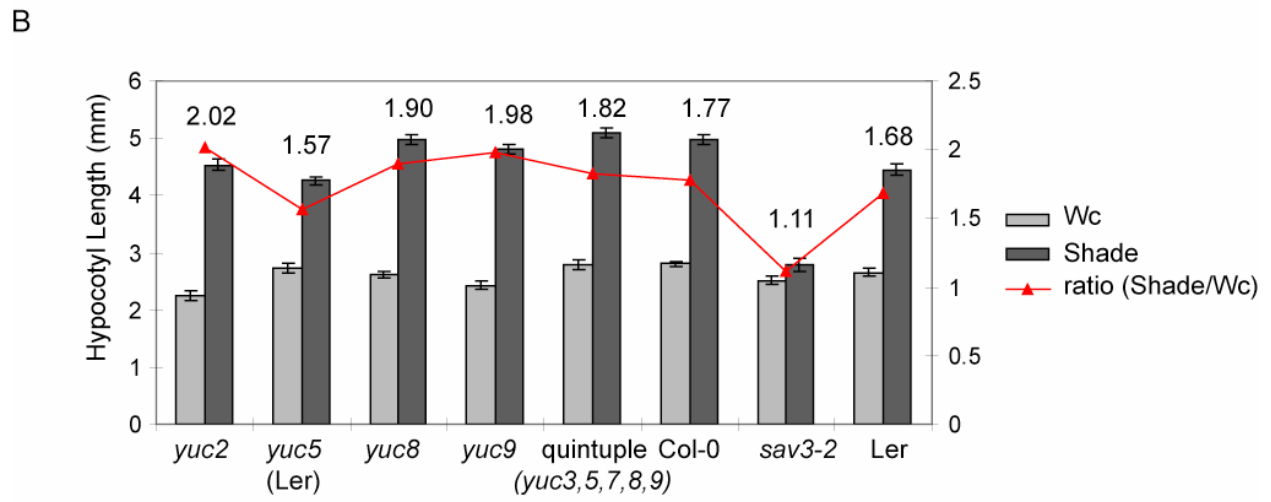

Figure S6
